1           **Identification and comparison of individual chromosomes of three *Hordeum***  
2                   ***chilense* accessions, *Hordeum vulgare* and *Triticum aestivum* by FISH**

3    María-Dolores Rey\*, Graham Moore, Azahara C. Martín

4    John Innes Centre, Crop Genetics Department, Norwich NR4 7UH, UK

5

6

7    \*Corresponding author: María-Dolores Rey (email: [mdoloresrey@ias.csic.es](mailto:mdoloresrey@ias.csic.es))

8

9

10

11

12

13

14

15

16

17

18

19

20

21

22

23

24 **Abstract**

25 Karyotypes of three accessions of *Hordeum chilense* (H1, H16 and H7), *Hordeum vulgare* and *Triticum*  
26 *aestivum* were characterized by physical mapping of several repetitive sequences. A total of fourteen  
27 repetitive sequences were used as probes for fluorescence in situ hybridization (FISH) with the aim of  
28 identifying inter- and intra-species polymorphisms. The (AG)<sub>12</sub> and 4P6 probes only produced  
29 hybridization signals in wheat, the BAC7 probe only hybridized to the centromeric region of *H. vulgare*,  
30 and the pSc119.2 probe hybridized to both wheat and *H. chilense*, but not to *H. vulgare*. The remaining  
31 repetitive sequences used in this study produced a hybridization signal in all the genotypes. Probes pAs1,  
32 pTa535, pTa71, CCS1 and CRW were much conserved, showing no significant polymorphism among the  
33 genotypes studied. Probes GAA, (AAC)<sub>5</sub>, (CTA)<sub>5</sub>, HvT01 and pTa794 produced the most different  
34 hybridization pattern. We identified large polymorphisms in the three accessions of *H. chilense* studied,  
35 supporting the proposal of the existence of different groups inside *H. chilense* species. The set of probes  
36 described in this work allowed the identification of every single chromosome in all three species, providing  
37 a complete cytogenetic karyotype of *H. chilense*, *H. vulgare* and *T. aestivum* chromosomes, useful in wheat  
38 and tritordeum breeding programs.

39

40 *Key words: Hordeum, Triticum aestivum, tritordeum, FISH, repetitive sequences*

41

42

43

44

45

46

47

48

49

## 50 **Introduction**

51 *Hordeum chilense* Roem. et Schultz. ( $2n = 2x = 14$ ;  $H^{ch}H^{ch}$ ) is a diploid wild barley, native of Chile and  
52 Argentina (von Bothmer et al. 1995), which shows very useful traits for wheat breeding, including drought  
53 and salt tolerance (Gallardo and Fereres 1980; Forster et al. 1990), resistance to pests and diseases (Martín  
54 et al. 1996) and high seed carotenoid content (Atienza et al. 2004). Several substitution and addition lines  
55 have been developed to transfer these traits into wheat (Miller et al. 1982; Fernández and Jouve 1988), and  
56 recently, some accessions of *H. chilense* have been used to produce male sterility in wheat with the aim of  
57 establishing a wheat hybrid system (Martín et al. 2008; Martín et al. 2010; Castillo et al. 2014). In addition,  
58 a major interest in this species relates to its high crossability with other members of the Triticeae tribe (von  
59 Bothmer et al. 1986; Martín et al. 1998). Evidence of this is the obtaining of fertile amphiploids named  
60 tritordeum ( $\times$ *Tritordeum* Ascherson et Graebner), which were obtained after chromosome doubling of  
61 hybrids between *H. chilense* and tetraploid and hexaploid wheats (Martín and Sánchez-Monge Laguna,  
62 1982; Padilla and Martín 1983; Martín et al. 1999). In addition to *H. chilense*, other *Hordeum* species have  
63 been hybridized with wheat; however, the only amphiploid showing enough fertility to be considered as a  
64 possible crop is  $\times$ *Tritordeum martinii* ( $H^{ch}H^{ch}AABB$ ) (Pujadas Salvá 2016), which resulted from  
65 interspecific crosses between *H. chilense* and cultivated durum wheat. Today, *Tritordeum martinii* is grown  
66 in Spain, France, and Italy, being the only synthetic amphiploid crop commercialized for human  
67 consumption.

68  
69 *Hordeum chilense* is an extremely variable species, which can be found in many contrasting  
70 environments (Tobes et al. 1995; Giménez et al. 1997). It shows a very wide range of variation of  
71 morphological characters (von Bothmer et al. 1980, 1995), different levels of avoidance to barley leaf rust  
72 (Rubiales and Niks 1992, 1996) and it even differs at the cytoplasmic level (Atienza et al. 2007; Martín et  
73 al. 2009). In 2001, a study concluded that *H. chilense* consists of at least three morphologically and  
74 genetically distinct subspecific taxa (Vaz Patto et al. 2001). However, not much work has been done to  
75 identify or define further these three subspecific taxa or groups.

76  
77 *Hordeum chilense*, and the genus *Hordeum* in general, has been characterized by FISH using several  
78 repetitive sequences. However, most of the repetitive probes used in this genus were aimed at identifying  
79 the 7 pairs of *Hordeum* chromosomes, and more repetitive sequences are required to identify individual

80 chromosome arms or smaller regions introgressed into wheat, which ultimately, is the goal in most  
81 introgression breeding programs.

82 In this work, we use fourteen repetitive sequences, for the identification and comparison by FISH, of  
83 all individual chromosomes of *H. chilense*, *H. vulgare* and *T. aestivum*. Furthermore, we increase the  
84 knowledge of the karyotype of the different *H. chilense* groups described, by using these probes in the  
85 analysis of three *H. chilense* accessions (H1, H16 and H7), each one of them belonging to one of the three  
86 different groups.

87

## 88 **Materials and methods**

### 89 **Plant material**

90 *Hordeum vulgare* cv. Betzes, *Tritordeum martinii* “HT27” and three accessions of *Hordeum chilense*  
91 (H1, H16 and H7) were kindly provided by Prof. Antonio Martín from the Instituto de Agricultura  
92 Sostenible (CSIC, Spain). *Hordeum chilense* accessions H1, H16 and H7 belong to the group I, II and III  
93 respectively, described by Vaz Patto et al. (2001). *Triticum aestivum* cv. Chinese Spring was also used in  
94 this work.

### 95 **Fluorescent in situ hybridization (FISH)**

#### 96 *Chromosome preparation for FISH*

97 Seeds of each genotype used in this study were germinated on wet filter paper in the dark for 5 days at  
98 4°C, followed by a period of 24h-48h at 25°C under constant light. Root tips were obtained from these  
99 seedlings and occasionally, from adult plants grown in pots in a controlled environmental room (16/8 h,  
100 light/dark photoperiod at 20 °C day and 15°C night, with 70% humidity). Preparation of chromosome  
101 spreads was done following Kato et al. (2004) and King et al. (2017) with slight modifications. These  
102 modifications were: roots were mainly excised from seedlings, although occasionally, adult plants were  
103 also used in the obtaining of chromosomes spreads. Also, the percentage of cellulase was increased from  
104 2% to 4%, being the final enzymatic cocktail: 1% pectolyase Y23 and 4% cellulose Onozuka R-10 (Yakult  
105 Pharmaceutical, Tokyo) solution in 1x citrate buffer.

#### 106 *Development of probes and labelling*

107 Fourteen repetitive sequences were used in this work (Table 1). All of them were amplified by PCR and  
108 the primer sequences and PCR conditions are described in Table 1. Three different polymerase enzymes  
109 were used: BIOTOOLS™ DNA polymerase (Biotools S.A., Madrid, Spain); KAPA3G plant polymerase  
110 (VWR International GmbH, Erlangen, Germany); and MyFi DNA polymerase (Bioline USA, Taunton,  
111 MA) (Table 1). PCR was performed in 50 µl reaction mixtures according to the manufacturer's instructions  
112 of each polymerase, and PCR products were resolved on 2% agarose gels in 1xTBE, stained with ethidium  
113 bromide and visualized under UV light. The PCR products were purified using a Qiagen kit (Qiagen,  
114 Hilden, Germany) following the manufacturer's instructions. The purified PCR products were labelled with  
115 either biotin-16-dUTP or digoxigenin-11-dUTP, using the Biotin-nick translation mix or the DIG-nick  
116 translation mix, respectively (Sigma, St. Louis, MO, USA) according to the manufacturer's instructions.  
117 Nick translation was performed in a PCR machine at 15°C for 90 min followed by a final step at 68°C for  
118 10 min. *Hordeum chilense* was also used to re-probe the samples after FISH with the repetitive sequences  
119 in order to identify the *H. chilense* chromosomes in the tritordeum line (HT27). *Hordeum chilense* DNA  
120 was extracted from leaves of young plants following the CTAB method described in Murray and Thomson  
121 (1980).

#### 122 *FISH and GISH experiments*

123 The FISH protocol used in this work was a combination of two protocols previously described in  
124 Cabrera et al. (2002) and King et al. (2017). The FISH procedure was performed over two days. Unless  
125 indicated otherwise, washes were carried out at room temperature. First day: Slides were crosslinked in an  
126 UV Cross linker at 0.125 Joules for 30 secs (twice). The hybridization mixture consisted of 50% formamide,  
127 10% dextran sulfate, 2x saline sodium citrate (SSC), 0.125% sodium dodecyl sulfate (SDS) and 0.1 mg of  
128 salmon sperm DNA. The concentration of each probe in the hybridization mixture is described in Table 1.  
129 The hybridization mixture was denatured for 8 min at 80 °C and cooled on ice for 5 min. A 40 µl-aliquot  
130 of the hybridization mixture was added to the cross-linked samples and a cover-slip applied. Slides were  
131 incubated in an in-situ PCR thermal cycler (Leica Microsystems™ ThermoBrite™, Leica Biosystems,  
132 Wetzlar, Germany) at 80°C for 7 min to denature the chromosomes. The hybridization was carried out  
133 overnight (20-24h) at 37 °C in a humid chamber. Second day: slides were washed in 2xSSC twice for 5  
134 min at 37°C, in 1xSSC twice for 5 min and in TNT (0.1 mol/L Tris-HCL, 0.15 mol/L NaCL, 0.05% Tween-  
135 20) for 5 min. Slides were then blocked in 50% (w/v) dried skimmed milk in TNT for 20 min at 37°C and  
136 washed in TNT for 2 min. For the detection of biotin and digoxigenin labelled probes, slides were incubated

137 at 37°C for 45 min with streptavidin-CY3 (Sigma) and antidigoxigenin-FITC (Sigma) in 1x phosphate  
138 buffered saline (PBS), respectively (Table 1). Slides were then washed in TNT for 5 min and dehydrated  
139 in 70% and 100% ethanol for 1 min. After counter-staining with 4', 6-diamidino-2-phenylindol (DAPI) for  
140 5 min, slides were washed in water for 5 min, dehydrated again and mounted in Vectashield (Vector  
141 Laboratories, Burlingame, CA, USA). In tritordeum “HT27”, all chromosome spreads were re-hybridized  
142 following the reprobing method of Heslop-Harrison et al. (1992), in order to identify the *H. chilense*  
143 chromosomes in the wheat background.

#### 144 *Image acquisition and chromosome identification*

145 Hybridization signals were examined using a Leica DM5500B microscope equipped with a Hamamatsu  
146 ORCA-FLASH4.0 camera and controlled by Leica LAS X software v2.0. Digital images were processed  
147 using Adobe Photoshop CS5 (Adobe Systems Incorporated, USA) extended version 12.0 × 64.

148 The ideogram for H1, H16, H7, *H. vulgare* and *T. aestivum* chromosomes was based on the  
149 hybridization patterns of the probes used in this work and the morphology of chromosomes previously  
150 described (Cabrera et al. 1995; Pedersen and Langridge 1997; Prieto et al. 2004; Kato 2011; Szakács et al.  
151 2013; Komuro et al. 2013; Tang et al. 2014).

152

## 153 **Results**

### 154 **Repetitive sequences hybridized to mostly terminal and interstitial regions: pAs1 and pTa-535**

155 The pAs1 probe is a repetitive DNA sequence isolated from *Aegilops tauschii* Coss. (formerly known  
156 as *Ae. squarrosa* L.) (Rayburn and Gill 1986). The pTa-535 is a 342-bp tandem repeat isolated from *T.*  
157 *aestivum* L. (Komuro et al. 2013).

158 Both probes show similar hybridization patterns in all the *Hordeum* analysed in this work, H1, H16, H7  
159 and *H. vulgare*, with all the chromosomes showing signals in both arms (Fig. 1). The three accessions of  
160 *H. chilense* H1, H16 and H7 show no major differences in their hybridization patterns (Fig. 1). The lowest  
161 and weakest number of hybridization signals per chromosome was observed in *H. vulgare* (Fig. 1). Both  
162 pAs1 and pTa-535 predominantly hybridized to the telomeric and subtelomeric regions, with some  
163 interstitial and centromeric signals in some chromosomes (Fig. 1). In H1, H16 and H7, chromosomes 1H<sup>ch</sup>

164 and 4H<sup>ch</sup> exhibited weaker signals than the rest of the chromosomes; while in *H. vulgare*, chromosomes  
165 3H<sup>v</sup>, 4H<sup>v</sup> and 5H<sup>v</sup> exhibited the weakest signals (Fig. 1).

166 In wheat, both probes mainly hybridized to both chromosome arms in all D genome chromosomes as  
167 previously described (Rayburn and Gill 1986; Komuro et al. 2013). Signals were also predominantly  
168 telomeric and subtelomeric, as was observed in the *Hordeum* analysed. Some chromosomes from the A and  
169 B-genomes occasionally hybridized to both probes, but these signals were weak and unsteady, so only D-  
170 genome chromosomes were identified in this work.

171

### 172 **Repetitive sequences hybridized to terminal regions: pSc119.2 and HvT01**

173 The pSc119.2 probe is a repetitive sequence containing 120 bp from *Secale cereal* L. (Bedbrook et al.  
174 1980). The HvT01 is a subtelomeric sequence from *H. vulgare* L. (Belostotsky and Ananiev 1990).  
175 Hybridization signals with both pSc119.2 and HvT01 were polymorphic in all plant material analyzed in  
176 this study (Figs. 2, 5).

177 In *H. chilense* H1, six pairs and seven pairs of chromosomes were hybridized to pSc119.2 and HvT01,  
178 respectively (Fig. 2). Probe pSc119.2 did not hybridize on chromosome 3H<sup>ch</sup>, and the signals produced on  
179 chromosome 7H<sup>ch</sup> were weak (Fig. 2). The pSc119.2 signals were detected on the short arm of 1H<sup>ch</sup>, 2H<sup>ch</sup>,  
180 5H<sup>ch</sup> and 7H<sup>ch</sup> (1H<sup>ch</sup>S, 2H<sup>ch</sup>S, 5H<sup>ch</sup>S and 7H<sup>ch</sup>S), on the long arm of 6H<sup>ch</sup> (6H<sup>ch</sup>L) and on both arms of 4H<sup>ch</sup>  
181 (Fig. 2). Probe HvT01 was detected on 2H<sup>ch</sup>S, 4H<sup>ch</sup>S, 5H<sup>ch</sup>S, 6H<sup>ch</sup>L and 7H<sup>ch</sup>S, and on both arms of 1H<sup>ch</sup>  
182 and 3H<sup>ch</sup> (Fig. 2). In *H. chilense* H16, four pairs of chromosomes were labelled with pSc119.2 and HvT01  
183 (Fig. 2). The pSc119.2 signals were detected on 1H<sup>ch</sup>S, 5H<sup>ch</sup>S, 6H<sup>ch</sup>L and on both arms of 4H<sup>ch</sup> (Fig. 2).  
184 The HvT01 signals were detected on 3H<sup>ch</sup>S, 4H<sup>ch</sup>S, 6H<sup>ch</sup>L and on both arms of 5H<sup>ch</sup> (Fig. 2). In *H. chilense*  
185 H7, both repetitive sequences (pSc119.2 and HvT01) were detected on 3 pairs of chromosomes (Fig. 2).  
186 The pSc119.2 signals were observed on 5H<sup>ch</sup>S and on both arms of 1H<sup>ch</sup> and 4H<sup>ch</sup> (Fig. 2). The HvT01  
187 signals were detected on 3H<sup>ch</sup>S, 4H<sup>ch</sup>S and 5H<sup>ch</sup>S (Fig. 2). The HvT01 signals obtained in H1 and H7 agreed  
188 with the results of Prieto et al. (2004).

189 In *H. vulgare*, no hybridization signal was detected using the pSc119.2 probe (Fig. 2), which agreed  
190 with previous studies (Gupta et al. 1989). However, all pairs of chromosomes were hybridized to HvT01  
191 on both chromosome arms, except 2H<sup>v</sup>S (Fig. 2).

192 In wheat, thirteen pairs of chromosomes were hybridized to the pSc119.2 (Fig. 5). Signals were detected  
193 on all B-genome chromosomes and on chromosomes 4AL, 5AS, 2DS, 3DS, 4DS and 5DS (Fig. 5). All the  
194 pSc119.2 signals were detected at the telomeric and subtelomeric regions (Fig. 5) as observed in the genus  
195 *Hordeum*. Probe HvT01 did not produce any signal in wheat. Occasionally, two pairs of chromosomes  
196 showed a very weak signal, but since the results were not consistent, they were not considered in this work  
197 (Fig. 5).

198

199 **Repetitive sequences hybridized mostly to interstitial, centromeric and pericentromeric regions:**  
200 **GAA, (AAC)<sub>5</sub>, (CTA)<sub>5</sub>, 4P6 and (AG)<sub>12</sub>**

201 The GAA probe is a GAA-satellite sequence from wheat and barley (Dennis et al. 1980; Pedersen et al.  
202 1996). The (AAC)<sub>5</sub> probe is a tri-nucleotide repeat from *T. aestivum* L. (Cuadrado et al. 2008). The (CTA)<sub>5</sub>  
203 probe is a tri-nucleotide repeat from *T. aestivum* L., which has been used for the first time in this work. The  
204 4P6 probe is a tandem repeat BAC clone from *Ae. tauschii* Coss. (Zhang et al. 2004). The (AG)<sub>12</sub> probe is  
205 a di-nucleotide repeat from *T. aestivum* L. (Cuadrado et al. 2008).

206 The GAA sequence was abundant in all the analysed species, allowing for the identification of all  
207 *Hordeum* chromosomes and all the wheat B-genome chromosomes (Figs. 3,5). This probe predominantly  
208 hybridized to interstitial and pericentromeric regions, with some distal signals in some chromosomes. In *H.*  
209 *chilense* H1, several pericentromeric signals were detected on chromosomes 3H<sup>ch</sup> and 7H<sup>ch</sup>, and several  
210 interstitial signals on 4H<sup>ch</sup>S and 2H<sup>ch</sup>S. Chromosome 1H<sup>ch</sup>L was the only chromosome showing a strong  
211 terminal signal. Chromosome 5H<sup>ch</sup>S and 7H<sup>ch</sup>S showed occasionally a weak interstitial and telomeric signal,  
212 respectively. In *H. chilense* H16, the hybridization pattern was slightly different to H1. Chromosomes 6H<sup>ch</sup>  
213 and 7H<sup>ch</sup> showed several pericentromeric and centromeric signals, chromosome 4H<sup>ch</sup>S and 5H<sup>ch</sup>L showed  
214 several interstitial signals and chromosome 2H<sup>ch</sup>L showed a strong interstitial signal. Chromosomes 1H<sup>ch</sup>L  
215 and 3H<sup>ch</sup>L showed a strong terminal signal. Chromosomes 1H<sup>ch</sup>S and 4H<sup>ch</sup>S showed occasionally a weak  
216 telomeric signal, and 2H<sup>ch</sup>L and 7H<sup>ch</sup>L a weak interstitial one (Fig. 3). *Hordeum chilense* H7 showed less  
217 signals than H1 and H16. Chromosomes 2H<sup>ch</sup>, 3H<sup>ch</sup>, 4H<sup>ch</sup>, 5H<sup>ch</sup> and 6H<sup>ch</sup> showed several pericentromeric  
218 signals, and chromosomes 4H<sup>ch</sup>S and 7H<sup>ch</sup>S showed several interstitial signals. Chromosome 2H<sup>ch</sup>L showed  
219 a strong interstitial signal. Chromosomes 1H<sup>ch</sup>L, 3H<sup>ch</sup>L and 7H<sup>ch</sup>S showed a terminal signal (Fig. 3). The  
220 hybridization pattern detected with the GAA probe on *H. vulgare* was quite different to the pattern observed



221 in *H. chilense*. All chromosomes showed centromeric or pericentromeric signals, with only chromosome  
222 3H<sup>v</sup>L showing a strong distal signal (Fig. 3). As mentioned above, in wheat, the GAA probe hybridized to  
223 all B-genome chromosomes, with strong signals distributed along the whole chromosomes (Fig. 5). All  
224 chromosomes from the A-genome plus 1DS, 7DS and both arms of 2D, also showed some GAA signal, but  
225 the number and intensity were much lower than the ones observed in the B-genome (Fig. 5). The GAA  
226 signals pattern agreed with the one described by Pedersen and Langridge (1997).

227 The (AAC)<sub>5</sub> probe produced an intense signal at the centromeric region of all H1, H16 and H7  
228 chromosomes. An exception was chromosomes 5H<sup>ch</sup>, which did not show any signal, and 7H<sup>ch</sup>, which only  
229 showed an interstitial signal on the long arm (Fig. 3). This probe was quite conserved in the three *H. chilense*  
230 accessions used in this work. The only difference was on chromosome 4H<sup>ch</sup>L, which showed some  
231 interstitial signals in H1 and H16 accessions, but not in H7. In *H. vulgare*, the (AAC)<sub>5</sub> probe hybridized to  
232 the centromeric regions of all chromosomes (Fig. 3). In wheat, this probe hybridized to all B-genome  
233 chromosomes, and it is mainly distributed around the centromeric region, although some interstitial signals  
234 were also observed in some of the chromosomes (Fig. 5). Chromosomes 2AS, 4AL and 7AL also showed  
235 (AAC)<sub>5</sub> signals close to the centromere (Fig. 5).

236 The hybridization pattern of (CTA)<sub>5</sub> was similar in H1 and H16, hybridizing both to the centromeric  
237 regions of chromosomes 2H<sup>ch</sup> and 3H<sup>ch</sup>, and to 4H<sup>ch</sup>S in the case of H16 (Fig. 3). However, H7 showed a  
238 higher number of signals, with all chromosomes except for 5H<sup>ch</sup> showing signal (Fig. 3). In H7, signals  
239 were pericentromeric on chromosomes 1H<sup>ch</sup>L, 2H<sup>ch</sup>L, 3H<sup>ch</sup>L and 7H<sup>ch</sup>L and on both arms of 4H<sup>ch</sup>. On  
240 chromosome 6H<sup>ch</sup>, the signal was located at the NOR region (Fig. 3). *Hordeum vulgare* showed (CTA)<sub>5</sub>  
241 signals on all chromosomes, except for chromosomes 1H<sup>v</sup> and 3H<sup>v</sup>. It hybridized to the pericentromeric and  
242 subtelomeric regions on chromosomes 5H<sup>v</sup>L and 6H<sup>v</sup>S and only to the subtelomeric region on chromosomes  
243 2H<sup>v</sup>L, 4H<sup>v</sup>L and 7H<sup>v</sup>L (Fig. 3). In wheat, the (CTA)<sub>5</sub> probe hybridized interstitially to chromosomes 2AL,  
244 3AL, 5AL, 7AL and 7BL, and at the centromeric region on 2B and 3B (Fig. 5).

245 The 4P6 probe did not produce any signal in any of the *Hordeum* used in this study (Fig. S1). This probe  
246 only hybridized to the wheat D-genome (Fig. 5). In wheat, signals were detected on five D-genome  
247 chromosome pairs: on chromosomes 2DL, 4DL, 5DS, 6DS, and on both arms of chromosome 1D (Fig. 5).

248 The (AG)<sub>12</sub> probe, as 4P6, was absent in all *Hordeum* species used in this work (Fig. S1). In wheat,  
249 some signals were detected on the pericentromeric region of chromosomes 3BS, 5BS and 6BL (Fig. 5).

250

#### 251 **Repetitive sequences hybridized to ribosomal DNA: pTa71 and pTa794**

252 The pTa71 probe is a 9-kb EcoRI fragment of the 18S-25S rDNA isolated from *T. aestivum* (Gerlach  
253 and Bedbrook 1979). The pTa794 probe is a 410-bp BamHI fragment of the 5S rDNA isolated from *T.*  
254 *aestivum* (Gerlach and Dyer 1980).

255 Probe pTa71 did not show any difference among the *Hordeum* genotypes used in this study. Signals  
256 were detected on the 2 pairs of chromosomes with nucleolar organizing regions (NOR): 5H<sup>ch</sup>S and 6H<sup>ch</sup>S  
257 in *H. chilense*, and 5H<sup>v</sup>S and 6H<sup>v</sup>S in *H. vulgare* (Fig. 4). Our results agreed with the results previously  
258 published in numerous cytological studies (Cabrera et al. 1995; Szakács et al. 2013; Delgado et al. 2016).

259 On the contrary, the pTa794 probe showed a different pattern among the *Hordeum* studied. In *H.*  
260 *chilense* H1, H16 and H7, this probe was only detected on chromosome 5H<sup>ch</sup>S (Fig. 4). However, in *H.*  
261 *vulgare*, signals were detected on chromosomes 2H<sup>v</sup>L, 4H<sup>v</sup>L and 7H<sup>v</sup>L (Fig. 4). In wheat, the pTa71 probe  
262 was detected on chromosomes 1BS, 6BS and 5DS, and the pTa794 probe was observed on chromosomes  
263 1AS, 1BS, 1DS, 5AS and 5BS (Fig. 5).

264

#### 265 **Repetitive sequences hybridized to centromeric regions: BAC7, CRW and CCS1**

266 The BAC7 probe is a centromere-specific large insert clone from *H. vulgare* L. (Hudakova et al. 2001).  
267 The CRW probe is a wheat centromeric retrotransposon from *Ae. speltoides* Tausch. and *Ae. tauschii* Coss.  
268 (Liu et al. 2008). The CCS1 probe is a 260 bp region within the clone (Hi-10) isolated from *B. sylvaticum*  
269 L. (Abbo et al. 1995; Aragón-Alcaide et al. 1996).

270 The centromeric probe BAC7 (Hudakova et al. 2001) was specific to *H. vulgare*, labelling the  
271 centromeres of all chromosomes (Fig. 6). Neither *H. chilense* nor *T. aestivum* showed any signals when this  
272 probe was used (Fig. 6).

273 The centromeric probe CRW (Liu et al. 2008) was detected on all chromosomes of the three accessions  
274 of *H. chilense* (H1, H16, H7) and *H. vulgare* (Fig. 6). However, non-specific signals were also frequently  
275 observed along chromosomes (Fig. 6). In wheat, probe CRW also hybridized to the centromeric regions of  
276 all chromosomes (Fig. 6). Unlike the genus *Hordeum*, signals on wheat were strong and clear, labelling

277 exclusively the centromeric region. Chromosomes from the D-genome showed weaker signals than A and  
278 B-genome chromosomes, which is due to the fewer number of CRW copies as previously described (Liu et  
279 al. 2008).

280 The CCS1 probe (Aragón-Alcaide et al. 1996) was also detected in H1, H16, H7, *H. vulgare* and *T.*  
281 *aestivum* at the centromeric region (Fig. 6). However, as happened with the CRW probe, non-specific  
282 signals were frequently observed along chromosomes (Fig. 6). In wheat, the CCS1 pattern was the same as  
283 CRW: signals were strong, labelled the centromeric region and chromosomes from the D-genome showed  
284 weaker signals than A and B-genome chromosomes (Fig. 6).

285 Up until now, no *H. chilense* specific centromere probe has been described. Therefore, in an attempt to  
286 identify *H. chilense* centromeres in the background of wheat, both probes were tested in the *Tritordeum*  
287 line “HT27” (described in Cabo et al. 2014a). All wheat chromosomes showed CRW and CCS1 signals as  
288 expected; however, surprisingly, *H. chilense* chromosomes did not show any signal with any of the probes  
289 (Fig. S2). On the other hand, the probe (AAC)<sub>5</sub>, which hybridized around the centromeres in these species,  
290 showed signals on *H. chilense* chromosomes in the background of bread wheat (Fig. S2).

291

## 292 **Discussion**

293 Triticeae species have large genomes, which are primarily composed of repetitive sequences. Many of  
294 these repetitive sequences have been used as probes in FISH analysis for genome differentiation,  
295 phylogenetic relationship analysis and chromosome identification among different species of the Triticeae  
296 tribe (Cabrera et al. 1995; Taketa et al. 2000; Hagraš et al. 2005; Jiang and Gill 2006; Marín et al. 2008;  
297 Cuadrado et al. 2013; Komuro et al. 2013). The identification and comparison of *H. chilense* and *H. vulgare*  
298 chromosomes have been carried out in several studies (Hagraš et al. 2005; Szakács et al. 2013), however,  
299 only a small number of probes and one accession of *H. chilense* were used. For the comparison of both *H.*  
300 *chilense* and *H. vulgare* with bread wheat, there is barely any published studies where all individual  
301 chromosomes are targeted. In this work, our aim was to provide a clear karyotype of *H. chilense*, *H. vulgare*  
302 and *T. aestivum* chromosomes, which could be useful in wheat breeding programs to monitor *H. chilense*  
303 and *H. vulgare* introgressions into wheat, but also to identify the wheat chromosomes where alien segments  
304 have been introgressed (Miller et al. 1982; Atienza et al. 2007; Calderón et al. 2012; Rey et al. 2015a,  
305 2015b). Moreover, *H. chilense* and wheat karyotypes would be useful in the development of tritordeum

306 lines, to monitor the chromosome constitution until stable lines are obtained, and to detect spontaneous  
307 reorganizations which can occur between *Hordeum* and wheat (Prieto et al. 2001; Cabo et al. 2014b;  
308 Delgado et al. 2016; Pujadas Salvá 2016; Delgado et al. 2017).

309 Here, fourteen repetitive probes were used, which accurately identified all individual chromosomes  
310 from three accessions of *H. chilense* (H1, H7 and H16), *H. vulgare* and *T. aestivum*. Briefly, the 4P6 and  
311 the (AG<sub>12</sub>) sequences were specific to wheat, and the BAC7 sequence was specific to *H. vulgare*. None of  
312 the probes described here was specific to *H. chilense*. The pSc119.2 probe hybridized to both wheat and *H.*  
313 *chilense*, but not to *H. vulgare*. The rest of the probes hybridized to all three species. At the individual  
314 chromosome level, using the pSc119.2, the HvT01 and the GAA probes together, we could identify each  
315 individual chromosome from the three accessions of *H. chilense* (H1, H16 and H7) and *H. vulgare*. In bread  
316 wheat, by using the pAs1 and the GAA probe together we could identify all individual chromosomes, and  
317 then by combining them with GISH to label the wheat genome, it was possible to differentiate every wheat  
318 chromosome from the ones from barley (both *H. chilense* and *H. vulgare*). The remaining repetitive  
319 sequences used in this study add further useful information, which, as indicated before, can be used in  
320 phylogenetic relationship analysis and when the identification of small chromosome fragments is required.

321 Three centromeric probes, BAC7, CCS1 and CRW were used in this study. Probe BAC7 was specific  
322 to *H. vulgare* as previously described (Hudakova et al. 2001), so no signal was detected in *H. chilense* and  
323 wheat. In the case of both CCS1 and CRW, they are conserved in the three species, labelling the centromeres  
324 of all chromosomes (Fig. 6). However, the hybridization signal on wheat was much stronger and clearer  
325 than in barley species (H1, H16, H7 and *H. vulgare*), which frequently showed some background signals.  
326 Moreover, a confusing result is that neither the CCS1 nor the CRW probes, showed any signal on *H.*  
327 *chilense* chromosomes when present in the background of tritordeum (Fig. S2). In tritordeum line HT27,  
328 wheat chromosomes always showed a centromeric signal, however, this signal was absent in *H. chilense*  
329 chromosomes. A possible explanation for this result is that barley carries fewer copies of both CCS1 and  
330 CRW and when placed in the background of wheat, the signal is too weak to be detected. This is observed  
331 in the case of the wheat D-genome, which carries less copies of CCS1 and CRW sequences compared to  
332 the A and B-genome, and accordingly, the hybridization signal is weaker (Liu et al. 2008). None of the  
333 centromeric sequences described, can therefore be used to identify the centromeric region of *H. chilense*  
334 chromosomes in tritordeum lines. However, an alternative is to use the (AAC)<sub>5</sub> probe. This repetitive  
335 sequence, hybridizes to the centromeric and pericentromeric region of all chromosomes of *H. chilense*,

336 except chromosome 5H<sup>ch</sup> and 7H<sup>ch</sup>, and to all chromosomes of *H. vulgare*. We tested the (AAC)<sub>5</sub> sequence  
337 in tritordeum line HT27, and *H. chilense* chromosomes were perfectly labelled (Fig. S2). Therefore, the  
338 (AAC)<sub>5</sub> sequence can be used to identify the centromeric region of most *H. chilense* chromosomes in  
339 tritordeum or any other wheat background.

340 It has been suggested that *H. chilense* consists of at least three morphologically and genetically distinct  
341 subspecific taxa or groups (Vaz Patto et al. 2001). Repetitive DNA sequences are the main components of  
342 heterochromatin and are subject to rapid change, therefore, changes in the distribution of repetitive DNA  
343 sequences can provide information of genome evolution and speciation. In this study, we selected one  
344 accession of each of the three groups described, to check whether the variability observed morphologically  
345 and with molecular markers, is also confirmed by FISH using the fourteen repetitive sequences. *Hordeum*  
346 *chilense* H1 belongs to group I, H16 to group II and H7 to group III. The results obtained in this work,  
347 support the presence of the three different groups. The centromeric probes and the NOR-associated probes  
348 did not show any difference among the different *H. chilense* accessions as expected, since they are very  
349 conserved regions. However, the seven repetitive sequences (pAs1, pTa-535, pSc119.2, HvT01, GAA,  
350 (AAC)<sub>5</sub> and (CTA)<sub>5</sub>) did differ. Probe (CTA)<sub>5</sub> showed the same hybridization pattern in H1 and H16, which  
351 differed from the one of H7. In the case of pAs1, pTa-535, pSc119.2, GAA and (CTA)<sub>5</sub>, the hybridization  
352 pattern was different in the three *H. chilense* accessions. Based on the FISH results obtained here, accessions  
353 H1 and H16 share more similarity between them than with H7. Although these results indicate that the  
354 selected set of probes could be useful for a phylogenetic analysis of the different groups described in *H.*  
355 *chilense*, these three accessions are only one of the many accessions included in each of the groups  
356 described, and to confirm the existence of different hybridization pattern in each group, more individuals  
357 from each group need to be analyzed.

358 Using the pAs1 probe, Cabrera et al. (1995) suggested that the D-genome from wheat, was the closest  
359 phylogenetically to the *H. chilense* genome. We were hoping to add more information supporting this result  
360 by using the fourteen probes described in this work. However, only the probes pAs1 and pTa-535, (which  
361 show a very similar hybridization pattern to pAs1) have shown some similarity between the D and H<sup>ch</sup>  
362 genomes.

363 The hybridization pattern obtained in this work agreed with what it has been published before except  
364 for the (AG)<sub>12</sub> sequence. We identified three pairs of wheat chromosomes (3BS, 5BS and 6BL) using this

365 probe, while Cuadrado et al. (2008) also describes a signal on chromosome 4B. This difference in the result  
366 is probably a consequence of the different FISH conditions used in each study. At this point, it is worth  
367 mentioning that some FISH signals can be altered by several factors such as the chromosome spread, the  
368 quality of the probe or even the sort of microscope used in the study. Moreover, the examination and  
369 identification of the hybridization pattern obtained using repetitive sequences is a complex process that  
370 requires experience and previous knowledge of the chromosomal morphology of the species studied. The  
371 chromosome spread is critical for obtaining good hybridization patterns when individual chromosomes,  
372 chromosome arms or smaller chromosome regions are identified. Some of the hybridization patterns  
373 described in this work have already been described previously using different methods for chromosomes  
374 spread preparations such as the use of colchicine, ice cold water or nitrous oxide gas (N<sub>2</sub>O) (Cabrera et al.  
375 1995; Taketa et al. 1999, 2000; Komuro et al. 2013; Tang et al. 2016). These three treatments are  
376 extensively used in cytogenetic analysis. However, in our experience, N<sub>2</sub>O treatment is the quickest, most  
377 reliable and most reproducible method. Here, we combined the protocols from Cabrera et al. (2002) and  
378 King et al. (2017) and provide a detailed protocol of how all the FISH experiments were performed in this  
379 study.

380 In summary, we use fourteen repetitive probes to create several karyotypes of *H. chilense* (accessions  
381 H1, H16, H7), *H. vulgare* and *T. aestivum*; which together, allow for the identification of every single  
382 chromosome in all three species. Moreover, we identify large polymorphism in the three accessions of *H.*  
383 *chilense* studied, which supports the proposal of the existence of different groups inside *H. chilense* species.

384

#### 385 **Author contributions**

386 These authors made the following contributions to the manuscript: M-D.R. and A.C.M. designed the  
387 research and wrote the manuscript. M-D.R. performed the research and analyzed the data. All authors read  
388 and approved the final manuscript.

389

#### 390 **Compliance with ethical standards**

391 **Conflict of interest** The authors declare that they have no conflict of interest.

392

393 **Research involving human participants and/or animals**

394 No research involving human participants or animals was performed.

395

396 **Acknowledgement**

397 The authors thank Ali Pendle (John Innes Centre, UK) for her valuable comments in the writing of the  
398 manuscript, Cai-yun Yang and Dr. Julie King (University of Nottingham (UK)) for allowing to go to their  
399 lab to learn the chromosome spread technique using N<sub>2</sub>O treatment and Dr. Angeles Cuadrado (University  
400 of Alcalá, (Spain)) for the supply of pTa794 clone. This work was supported by the UK Biotechnology and  
401 Biological Research Council (BBSRC) through a grant part of the Designing Future Wheat (DFW) Institute  
402 Strategic Programme ([BB/P016855/1](#)) and by a Marie Curie Fellowship Grant (H2020-MSCA-IF-2015-  
403 703117).

404

405 **References**

- 406 Abbo, S., Dunford, R.E., Foote, T., Reader, S.M., Flavell, R.B., and Moore, G. 1995. Organization of  
407 retroelement and stem-loop repeat families in the genomes and nuclei of cereals. *Chromosome Res.*  
408 **3**: 5–15.
- 409 Aragón-Alcaide, L., Miller, T., Schwatzacher, T., Reader, S., and Moore, G. 1996. A cereal centromeric  
410 sequence. *Chromosoma*, **105**: 261–268.
- 411 Atienza, S.G., Ávila, C.M., and Martín, A. 2007. The development of a PCR-based marker for PSY1 from  
412 *Hordeum chilense*, a candidate gene for carotenoid content accumulation in tritordeum seeds.  
413 *Crop. Pasture Sci.* **58**: 767–773.
- 414 Atienza, S.G., Ramírez, C.M., Hernández, P., and Martín, A. 2004. Chromosomal location of genes for  
415 carotenoid pigments in *Hordeum chilense*. *Plant Breeding*, **123**: 303–304.
- 416 Bedbrook, J.R., Jones, J., O'Neil, M., Thompson, R.D., and Flavell, R.B. 1980. Molecular characterization  
417 of telomeric heterochromatin in *Secale* species. *Cell*, **19**: 545–560.

- 418 Belostotsky, D.A., and Ananiev, E.V. 1990. Characterization of relic DNA from barley genome. Theor.  
419 Appl. Genet. **80**: 374–380.
- 420 Cabo, S., Carvalho, A., Martín, A., and Lima-Brito, J. 2014b. Structural rearrangements detected in newly-  
421 formed hexaploid tritordeum after three sequential FISH experiments with repetitive DNA  
422 sequences. J. Genet. **93**: 183–188.
- 423 Cabo, S., Carvalho, A., Rocha, L., Martín, A., and Lima-Brito, J. 2014a. IRAP, REMAP and ISSR  
424 fingerprinting in newly formed hexaploid tritordeum (9Tritordeum Ascherson et Graebner) and  
425 respective parental species. Plant Mol. Biol. Rep. **32**:761–770.
- 426 Cabrera, A., Friebe, B., Jiang, J., and Gill, B.S. 1995. Characterization of *Hordeum chilense* chromosomes  
427 by C-banding and in situ hybridization using highly repeated DNA probes. Genome, **38**: 435–442.
- 428 Cabrera, A., Martín, A., and Barro, F. 2002. In-situ comparative mapping (ISCM) of Glu-1 loci in Triticum  
429 and Hordeum. Chromosome Res. **10**(1): 49–54.
- 430 Calderón, M.D.C., Ramírez, M.D.C., Martín, A., and Prieto, P. 2012. Development of *Hordeum chilense*  
431 4H<sup>ch</sup> introgression lines in durum wheat: a tool for breeders and complex trait analysis. Plant  
432 Breeding, **131**: 733–738.
- 433 Castillo, A., Atienza, S.G., Martín, A.C. 2014. Fertility of CMS wheat is restored by two Rf loci located on  
434 a recombined acrocentric chromosome. J. Exp. Bot. **65**: 6667–6677.
- 435 Cuadrado, A., Cardoso, M., and Jouve, N. 2008. Increasing the physical markers of wheat chromosomes  
436 using SSRs as FISH probes. Genome, **51**(10): 809–815.
- 437 Cuadrado, A., Carmona, A., and Jouve, N. 2013. Chromosomal characterization of the three subgenomes  
438 in the polyploids of *Hordeum murinum* L.: New Insight into the Evolution of This Complex. PLoS  
439 ONE, 8(12): e81382.
- 440 Delgado, A., Carvalho, A., Martín A.C., Martín, A., and Lima-Brito, J. 2016. Use of the synthetic Oligo-  
441 pTa535 and Oligo-pAs1 probes for identification of *Hordeum chilense*-origin chromosomes in  
442 hexaploid tritordeum. Genet. Resour. Crop. Evol. **63**:945–951.
- 443 Delgado, A., Carvalho, A., Martín A.C., Martín, A., and Lima-Brito, J. 2017. Genomic reshuffling in  
444 advanced lines of hexaploid tritordeum. Genet. Resour. Crop. Evol. **64**(6): 1331–1353.



- 445 Dennis, E.S., Gerlach, W.L., and Peacock, W.J. 1980. Identical polypyrimidine-polypurine satellite DNAs  
446 in wheat and barley. *Hereditas*, **44**: 349–366.
- 447 Fernández, J.A., and Jouve, N. 1988. The addition of *Hordeum chilense* chromosomes to *Triticum turgidum*  
448 conv. durum. Biochemical, karyological and morphological characterization. *Euphytica*, **37**: 247–  
449 259.
- 450 Forster, B.P., Phillips, M.S., Miller, T.E., Baird, E., and Powell, W. 1990. Chromosome location of genes  
451 controlling tolerance to salt (NaCl) and vigour in *Hordeum vulgare* and *H. chilense*. *Heredity*, **65**:  
452 99-107.
- 453 Gallardo, M., and Fereres, E. 1989. Drought resistance in tritordeum (*Hordeum chilense* × *Triticum*  
454 *turgidum*) in relation to wheat, barley and triticale. *Invest. Agrar. Prod. Prot. Veg.* **4**: 361–37507.
- 455 Gerlach, W.L., and Bedbrook, J.R. 1979. Cloning and characterization of ribosomal RNA genes from wheat  
456 and barley. *Nucleic Acids Res.* **7**: 1869–1885.
- 457 Gerlach, W.L., and Dyer, T.A. 1980. Sequence organization of the repeating units in the nucleus of wheat  
458 that contain 5S rRNA genes. *Nucleic Acids Res.* **8**: 4851–4865.
- 459 Giménez, M.J., Cosío, F., Martínez, C., Silva, F., Zuleta, A., and Martín, L.M. 1997. Collecting *Hordeum*  
460 *chilense* Roem et Schult. germplasm in desert and steppe dominions of Chile. *Plant Genet. Resour.*  
461 *News.* **109**: 17–19.
- 462 Gupta, S.B. 1969. Duration of mitotic cycle and regulation of DNA replication in *Nicotiana plumbaginifolia*  
463 and a hybrid derivative of *N. tabacum* showing chromosome instability. *Can. J. Genet. Cytol.* **11**:  
464 133–142.
- 465 Hagra, A.A.A., Kishii, M., Tanaka, H., Sato, K., and Tsujimoto, H. 2005. Genomic differentiation of  
466 *Hordeum chilense* from *H. vulgare* as revealed by repetitive and EST sequences. *Genes Genet. Syst.*  
467 **80**: 147–159.
- 468 Heslop-Harrison, J.S., Harrison, G.E., and Leitch, I.J. 1992. Reprobing of DNA: DNA in situ hybridization  
469 preparations. *Trends Genet.* **8**: 372–373.
- 470 Hudakova, S., Michalek, W., Presting, G.G., Hoopen, R.T., Santos K.D., Jasencakova, Z., and Schubert, I.  
471 2001. Sequence organization of barley centromeres. *Nucleic Acids Res.* **29**(24): 5029–5035.

- 472 Jiang, J., and Gill, B.S. 2006. Current status and the future of fluorescence in situ hybridization (FISH) in  
473 plant genome research. *Genome*, **49**(9): 1057–1068.
- 474 Kato, A. 2011. High-density fluorescence in situ hybridization signal detection on barley (*Hordeum vulgare*  
475 L.) chromosomes with improved probe screening and reprobing procedures. *Genome*, **54**: 151–  
476 159.
- 477 Kato, A., Lamb, J.C. and Birchler, J.A. 2004. Chromosome painting using repetitive DNA sequences as  
478 probes for somatic chromosome identification in maize. *Proc. Natl Acad. Sci. USA* **101**: 13554–  
479 13559.
- 480 King, J., Grewal, S., Yang, C.Y., Hubbart, S., Scholefield, D., Ashling, S., Edwards, K.J., Allen, A.M.,  
481 Burridge, A., Bloor, C. Davassi A, da Silva, G.J., Chalmers K., and King I.P. 2017. A step change  
482 in the transfer of interspecific variation into wheat from *Amblyopyrum muticum*. *Plant Biotech J.*  
483 **15**: 217–226.
- 484 Komuro, S., Endo, R., Shikata, K., and Kato, A. 2013. Genomic and chromosomal distribution patterns of  
485 various repeated DNA sequences in wheat revealed by a fluorescence in situ hybridization  
486 procedure. *Genome*, **56**(3): 131–137.
- 487 Liu, Z., Yue, W., Li, D., Wang, R.R.C., Kong, X., Lu, K., Wang, G., Dong, Y., Jin, W., and Zhang, X.  
488 2008. Structure and dynamics of retrotransposons at wheat centromeres and pericentromeres.  
489 *Chromosoma*, **117**: 445–456.
- 490 Marín, S., Martín, A., and Barro, F. 2008. Comparative FISH mapping of two highly repetitive DNA  
491 sequences in *Hordeum chilense* (Roem. et Schult.). *Genome*, **51**(8): 580–588.
- 492 Martín, A., Álvarez, J.B., Martín, L.M., Barro, F., and Ballesteros J. 1999. The development of Tritordeum:  
493 A novel cereal for food processing. *J. Cereal Sci.* **30**(2): 85–95.
- 494 Martín, A., and Sánchez-Monge Laguna, E. 1982. Cytology and morphology of the amphiploid *Hordeum*  
495 *chilense* × *Triticum turgidum* conv. *durum*. *Euphytica*, **31**: 261–267.
- 496 Martín, A., Martín, L. M., Cabrera, A., Ramírez, M. C., Jimenez, M. J., and Rubiales, D. Hernández, P.,  
497 and Ballesteros, J. 1998. The potential of *Hordeum chilense* in breeding Triticeae species. Paper  
498 Presented at the Triticeae III (Enfield, NH: Science Publishers), 377–386.

- 499 Martín, A., Martínez-Araque, C., Rubiales, D., and Ballesteros, J. 1996. Tritordeum: triticale's new brother  
500 cereal. In: Guedes-Pinto H, Darvey N, Carnide VP (eds) Triticale: Today and Tomorrow, pp. 57–  
501 72. Kluwer Academic Publishers, Dordrecht, Netherlands.
- 502 Martín, A.C., Atienza, S.G, Ramírez, M.C., and Barro, F. 2008. Male fertility restoration of wheat in  
503 *Hordeum chilense* cytoplasm is associated with 6HchS chromosome addition. Aust. J. Agric. Res.  
504 **59**: 206–213.
- 505 Martín, A.C., Atienza, S.G, Ramírez, M.C., Barro, F., and Martín, A. 2009. Chromosome engineering in  
506 wheat to restore male fertility in the msH1 CMS system. Mol. Breed. **24**(4): 397–408.
- 507 Martín, A.C., Atienza, S.G, Ramírez, M.C., Barro, F., and Martín, A. 2010. Molecular and cytological  
508 characterization of an extra acrocentric chromosome that restores male fertility of wheat in the  
509 msH1 CMS system. Theor. Appl. Genet. **121**(6):1093–101.
- 510 Miller, T.E., Reader, S.M., and Chapman, V. 1982. The addition of *Hordeum chilense* chromosomes to  
511 wheat. In: Proc. Int. Symp. Eucarpia on Induced Variability in Plant Breeding (ed. C Broertjes).  
512 Pudoc, Wageningen, p. 79–81.
- 513 Murray, M.G., and Thompson, W.F. 1980. Rapid isolation of high molecular weight plant DNA. Nucleic  
514 Acids Res. **8**: 4321–4326.
- 515 Padilla, J.A., and Martín, A. 1983. Morphology and cytology of *Hordeum chilense* x *Hordeum bulbosum*  
516 hybrids. Theor. Appl. Genet. **65**(4): 535–355.
- 517 Pedersen, C., and Langridge, P. 1997. Identification of the entire chromosome complement of bread wheat  
518 by two color FISH. Genome, **40**: 589–593.
- 519 Pedersen, C., Rasmussen, S.K., and Linde-Laursen, I. 1996. Genome and chromosome identification in  
520 cultivated barley and related species of the Triticeae (Poaceae) by in situ hybridization with the  
521 GAA-satellite sequence. Genome, **39**: 93–104.
- 522 Prieto, P., Martín, A., and Cabrera, A. 2004. Chromosomal distribution of telomeric and telomeric-  
523 associated sequences in *Hordeum chilense* by in situ hybridization. Hereditas, **141**: 122–127.

- 524 Prieto, P., Ramírez M.C., Ballesteros, J., Cabrera, A. 2001. Identification of intergenomic translocations  
525 involving wheat, *Hordeum vulgare* and *Hordeum chilense* chromosomes by FISH. Hereditas,  
526 **135**(2-3): 171–174.
- 527 Pujadas Salvá, A.J. 2016. Notulae taxinomicae, Chorologicae, Nomenclaturales, Bibliographicae aut  
528 philogicae opus “Flora Ibérica” intendentes (44-46). 44. × TRITORDEUM MARTINII A.  
529 PUJADAS (POACEAE) NOTHOSP. NOV. Acta Bot. Malac. **41**: 325–338.
- 530 Rayburn, A.L., and Gill, B.S. 1986. Molecular identification of the D-genome chromosomes of wheat. J.  
531 Hered. **77**: 253–255.
- 532 Rey, M.D., Calderón, M.C., and Prieto, P. 2015a. The use of the *ph1b* mutant to induce recombination  
533 between the chromosomes of wheat and barley. Front. Plant. Sci. **6**: 160.
- 534 Rey, M.D., Calderón, M.C., Rodrigo, M.J., Zacarías, L., Alós, E., and Prieto, P. 2015b. Novel bread wheat  
535 lines enriched in carotenoids carrying *Hordeum chilense* chromosome arms in the *ph1b*  
536 background. PLoS ONE, 10(8); e0134598.
- 537 Rubiales, D., and Niks, R.E. 1992. Histological responses in *Hordeum chilense* to brown and yellow rust  
538 fungi. Plant Pathol. **41**(5): 611–617.
- 539 Rubiales, D., and Niks, R.E. 1996. Avoidance of rust infection by some genotypes of *Hordeum chilense*  
540 due to their relative inability to induce the formation of appressoria. Physiol. Mol. Plant Pathol.  
541 **49**(2): 89–101.
- 542 Szakács, É., Kruppa, K. and Molnár-Láng, M. 2013. Analysis of chromosomal polymorphism in barley  
543 (*Hordeum vulgare* L. ssp. *vulgare*) and between *H. vulgare* and *H. chilense* using three-color  
544 fluorescence in situ hybridization (FISH). J. Appl. Genetics **54**: 427–433.
- 545 Taketa, S., Ando, H., Takeda, K., Harrison, G. E. and Heslop-Harrison, J. S. 2000. The distribution,  
546 organization, and evolution of two abundant and widespread repetitive DNA sequences in the  
547 genus *Hordeum*. Theor. Appl. Genet. **100**:169–176.
- 548 Taketa, S., Harrison, G. E., and Heslop-Harrison, J. S. 1999. Comparative physical mapping of the 5S and  
549 18S-25S rDNA in nine wild *Hordeum* species and cytotypes. Theor. Appl. Genet. **98**: 1–9.

- 550 Tang, S., Qiu, L., Xiao, Z., Fu, Su., and Tang Z. 2016. New oligonucleotide probes for ND-FISH analysis  
551 to identify barley chromosomes and to investigate polymorphisms of wheat chromosomes. *Genes*,  
552 **7**: 118. doi:10.3390/genes7120118.
- 553 Tang, T., Yang, Z., and Fu, S. 2014. Oligonucleotides replacing the roles of repetitive sequences pAs1,  
554 pSc119.2, pTa-535, pTa71, CCS1, and pAWRC.1 for FISH analysis. *J. Appl. Genetics* **55**: 313–  
555 318.
- 556 Tobes, N., Ballesteros, J., Martínez, C., Lovazzano, G., Contreras, D., Cosio, F., Gastó, J., and Martín, L.M.  
557 1995. Collection mission of *Hordeum chilense* Roem. et Schult. in Chile and Argentina. Report of  
558 a collecting mission. *Genet. Resour. Crop. Evol.* **42**(3): 211–216.
- 559 Vaz Patto, M.C., Aardse, A., Buntjer, J., Rubiales, D., Martín, A., and Niks, R.E. 2001. Morphology and  
560 AFLP markers suggest three *Hordeum chilense* ecotypes that differ in avoidance to rust fungi.  
561 *Can. J. Bot.* **79**: 204–213.
- 562 Von Bothmer, R., Jacobsen, N., and Jorgensen, R. B. 1986. Taxonomy, variation, and relationships in the  
563 *Hordeum parodii* group (Poaceae). *Nord. J. Bot.* **6**: 399–410.
- 564 Von Bothmer, R., Jacobsen, N., and Nicora, E. 1980. Revision of *Hordeum* sect. *Anisolepis* Nevski. *Bot.*  
565 *Not.* **133**: 539–554.
- 566 von Bothmer, R., Jacobsen, N., Baden, C., Jorgensen, R.B., and Linde-Laursen, I. 1995. An  
567 ecogeographical study of the genus *Hordeum*, 2<sup>nd</sup> edn. Systematic and ecogeographic studies on  
568 crop genepools 7, Rome. ISBN-13: 978-932-9043-229-6.
- 569 Zhang, P., Li, W., Fellers, J., Friebe, B., and Gill, B.S. 2004. BAC-FISH in wheat identifies chromosome  
570 landmarks consisting of different types of transposable elements. *Chromosoma*, **112**: 288–299.

## 571 **Tables**

572 **Table 1. List of repetitive sequences with their primer sequences, annealing temperatures and**  
573 **polymerase enzymes used in PCR for the development of FISH probes.** F and R mean forward and  
574 reverse primers, respectively.

575

## 576 **Figure legends**

577 **Fig. 1. FISH patterns (a) and signal distributions (b) of pAs1 and pTa535 on mitotic metaphase**  
578 **chromosomes of *H. chilense* (H1, H16 and H7) and *H. vulgare*.**

579 **Fig. 2. FISH patterns (a) and signal distributions (b) of pSc119.2 and HvT01 on mitotic metaphase**  
580 **chromosomes of *H. chilense* (H1, H16 and H7) and *H. vulgare*.**

581 **Fig. 3. FISH patterns (a) and signal distributions (b) of GAA, (AAC)<sub>5</sub> and (CTA)<sub>5</sub> on mitotic**  
582 **metaphase chromosomes of *H. chilense* (H1, H16 and H7) and *H. vulgare*.**

583 **Fig. 4. FISH patterns (a) and signal distributions (b) of pTa71 and pTa794 on mitotic metaphase**  
584 **chromosomes of *H. chilense* (H1, H16 and H7) and *H. vulgare*.**

585 **Fig. 5. FISH patterns (a) and signal distributions (b) of the fourteen repetitive sequences used in this**  
586 **study on mitotic metaphase chromosomes of *T. aestivum* cv. Chinese Spring.**

587 **Fig. 6. Amplification by PCR and FISH patterns of BAC7, CCS1 and CRW of *H. chilense* (H1, H16**  
588 **and H7), *H. vulgare* and *T. aestivum* cv. Chinese Spring. The PCR products were visualized on 2 %**  
589 **agarose gels stained with ethidium bromide. L means 100-bp ladder as size marker (Solis BioDyne, Tartu,**  
590 **Estonia).**

591

## 592 **Supporting Information**

593 **Fig. S1. Absence of FISH signal using 4P6 and (AG)<sub>12</sub> probes on mitotic metaphase chromosomes of**  
594 ***H. chilense* (H1, H16 and H7) and *H. vulgare*.**

595 **Fig. S2. FISH pattern of CCS1, CRW and (AAC)<sub>5</sub> probes and identification by GISH of all *H. chilense***  
596 **chromosomes on mitotic metaphase chromosomes of tritordeum “HT27”.**

**(a)****H1****H16****H7****H106****pAs1**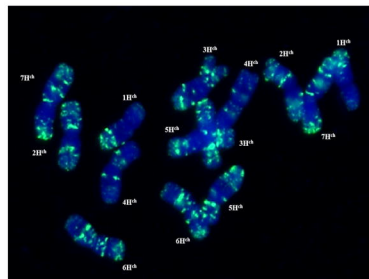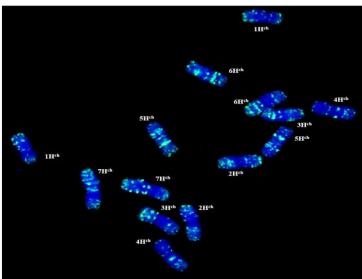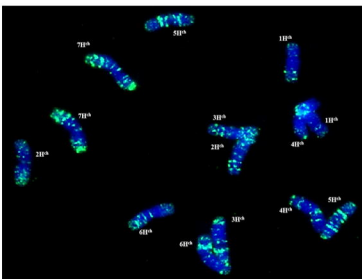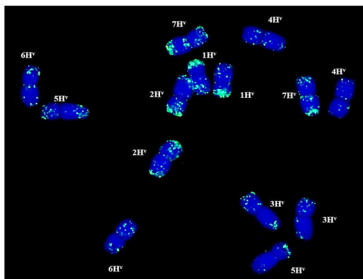**pTa-535**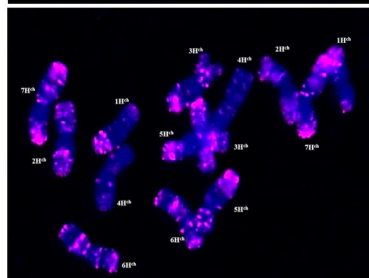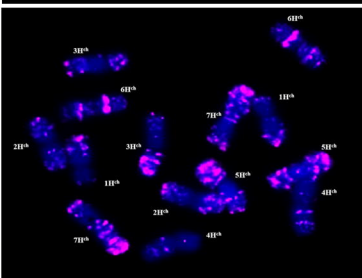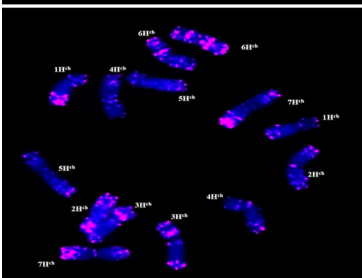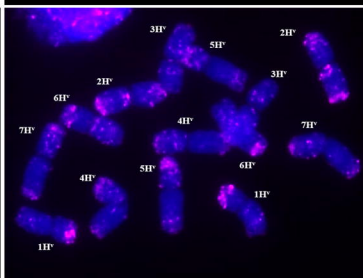**(b)**

**pAs1** ●●  
**pTa-535** ●●

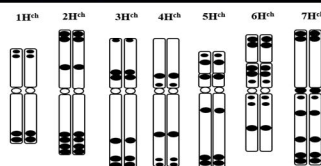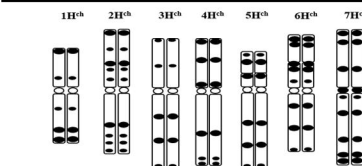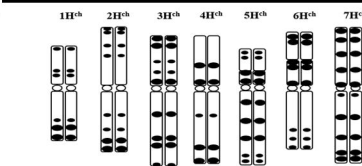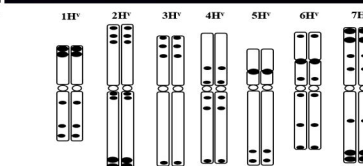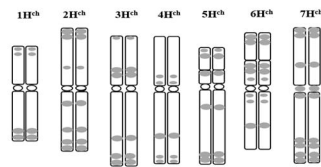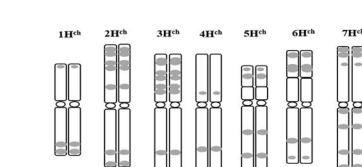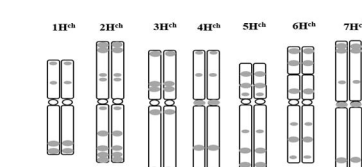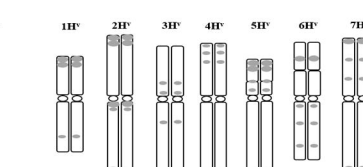

(a)

H1

H16

H7

H106

pSc119.2

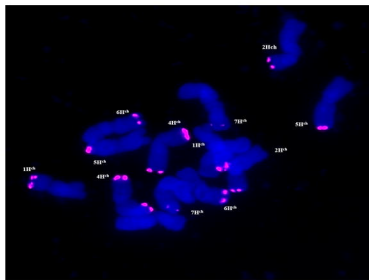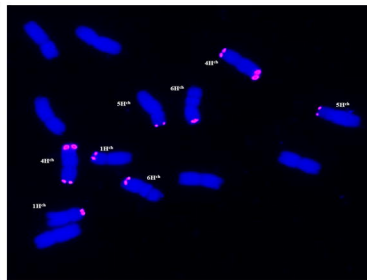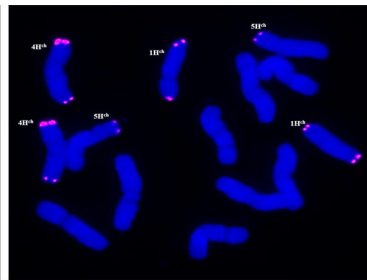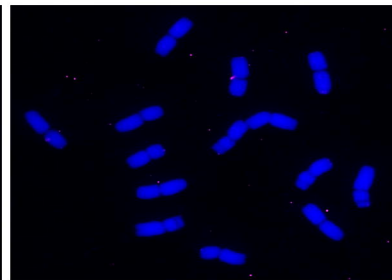

HvT01

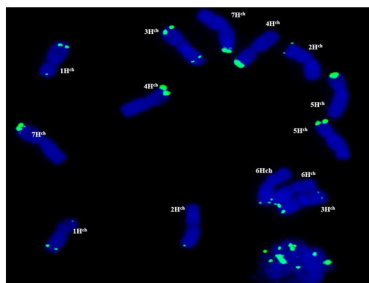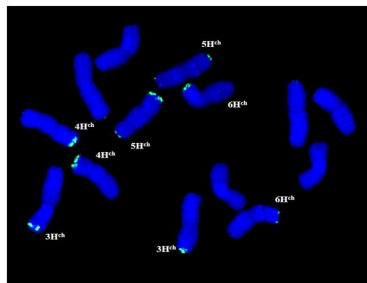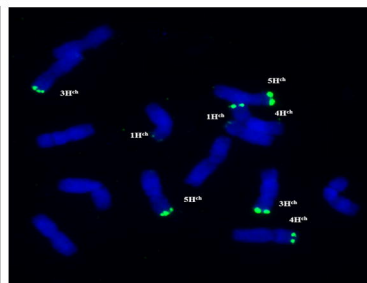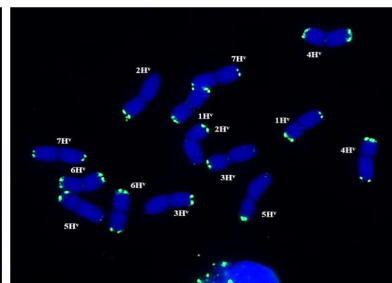

(b)

pSc119.2 ●●  
HvT01 ●●

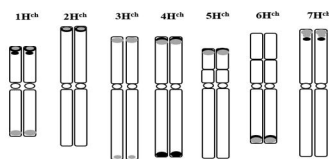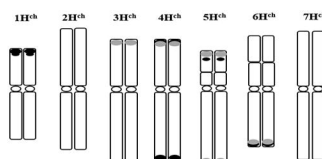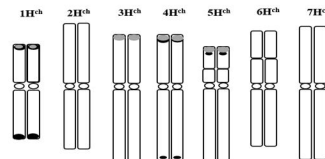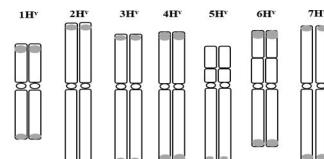



**(a)****H1****H16****H7****H106****GAA**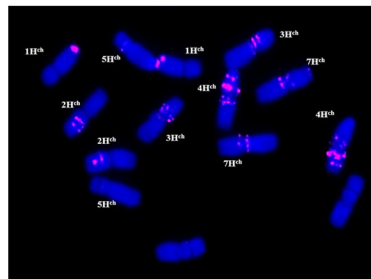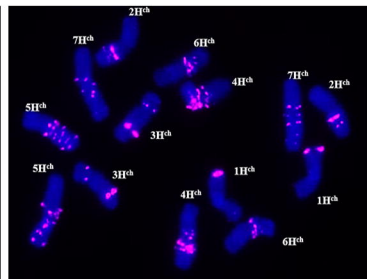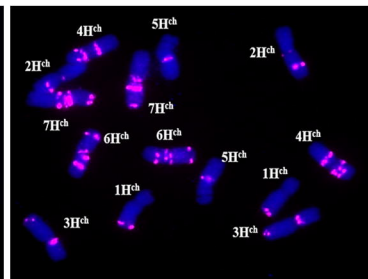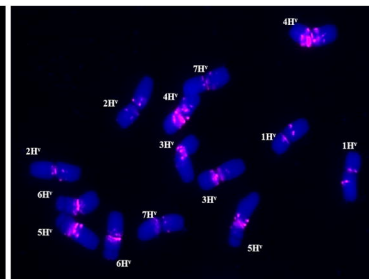**(AAC)<sub>5</sub>**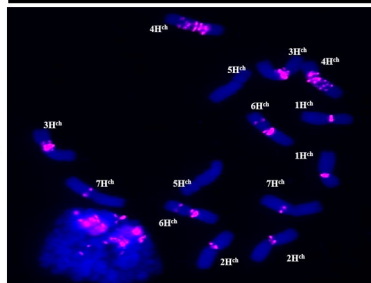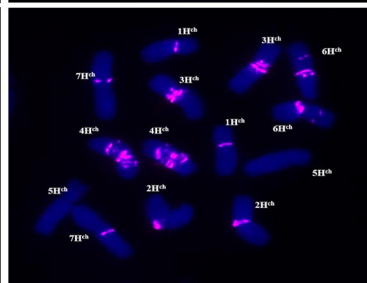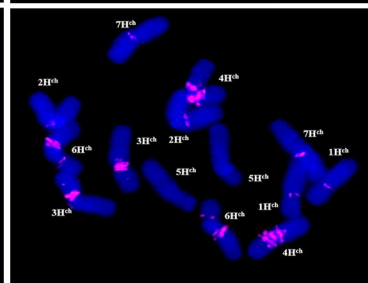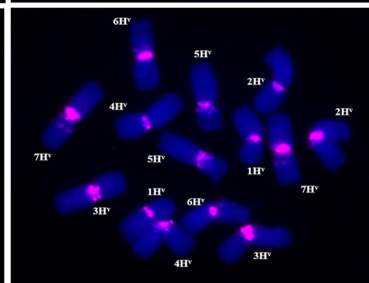**(CTA)<sub>5</sub>**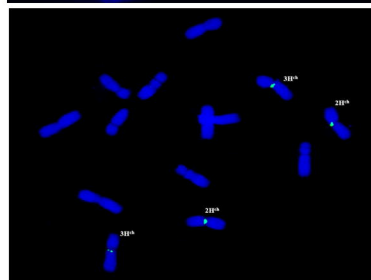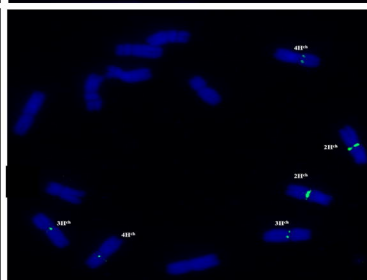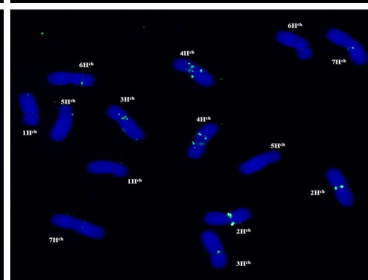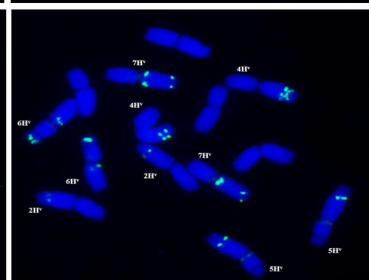**(b)**

**GAA** ●●  
**(AAC)<sub>5</sub>** ●●  
**(CTA)<sub>5</sub>** ///

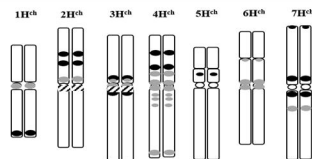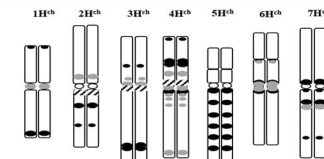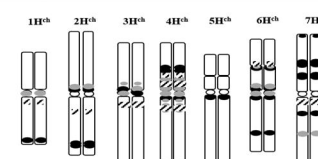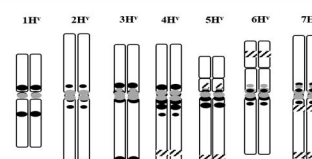

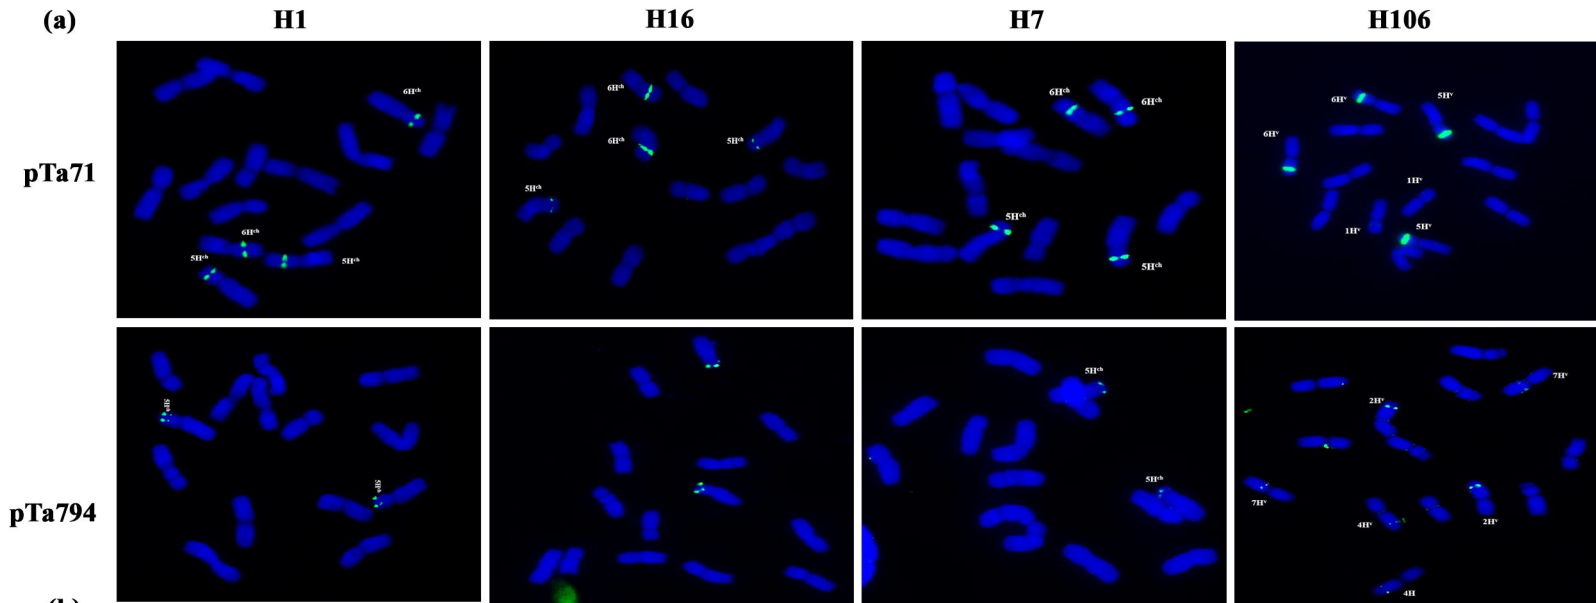

**(b)**

**pTa71** ●●  
**pTa794** ●●

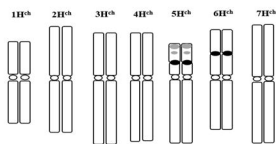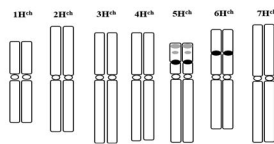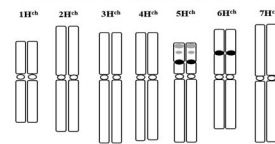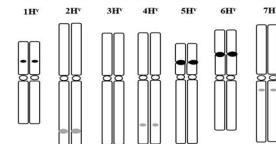

**(a)**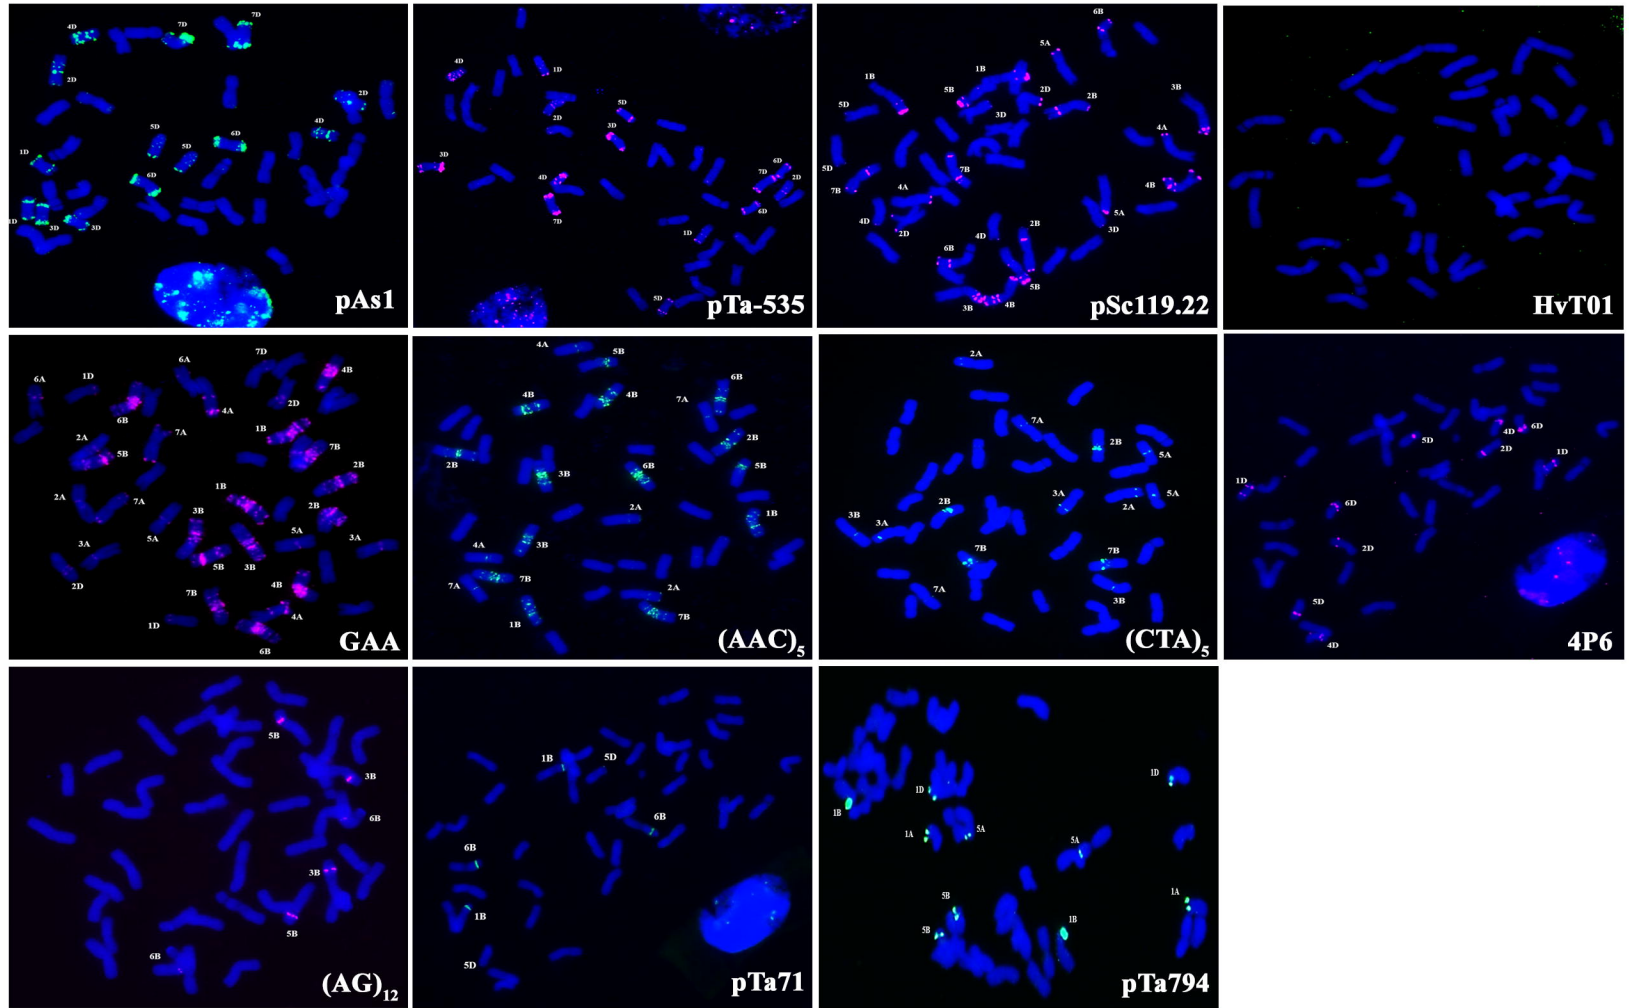**(b)**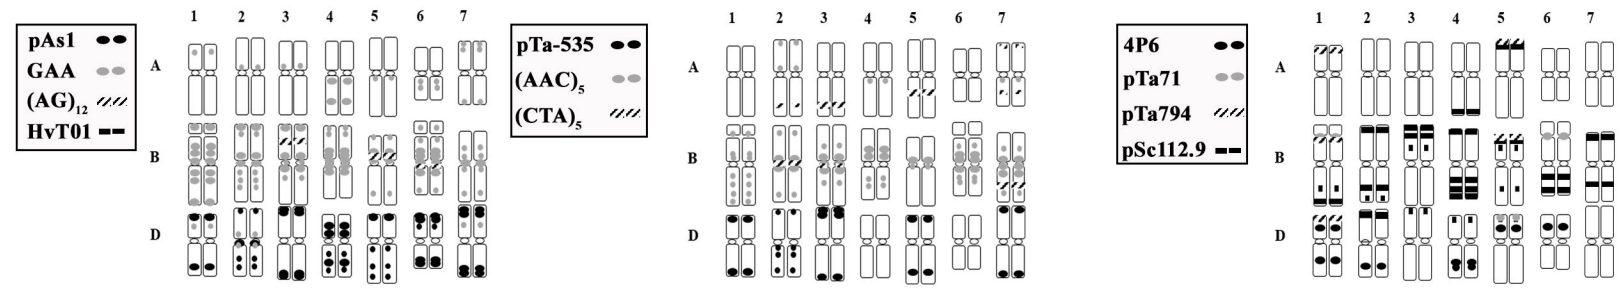

**BAC7**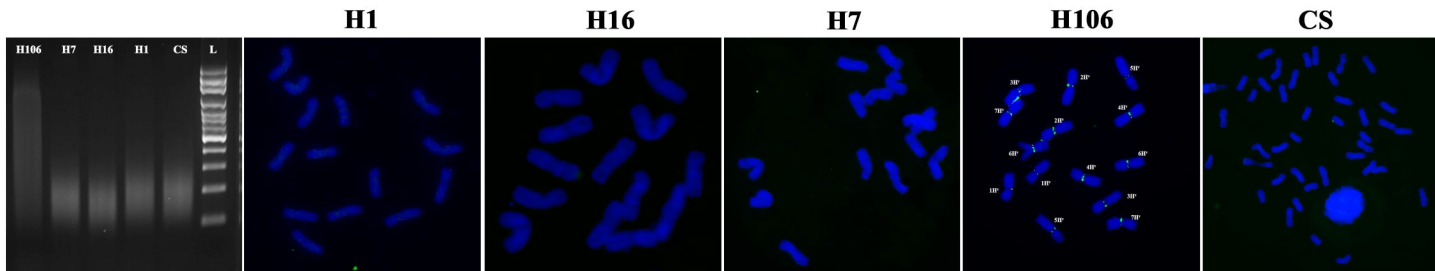**CCS1**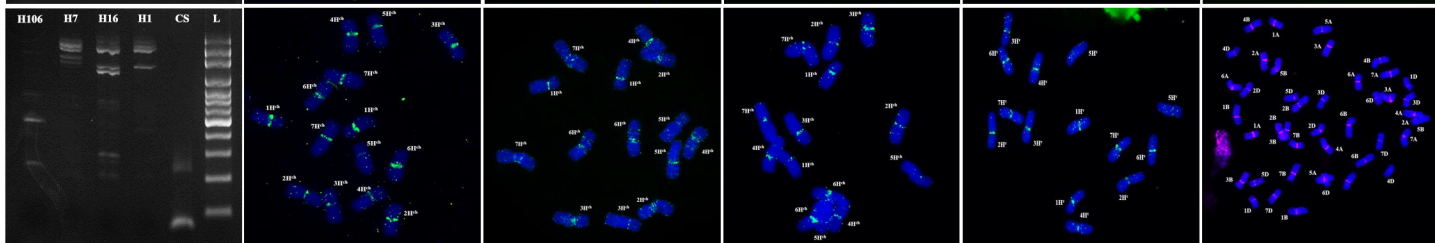**CRW**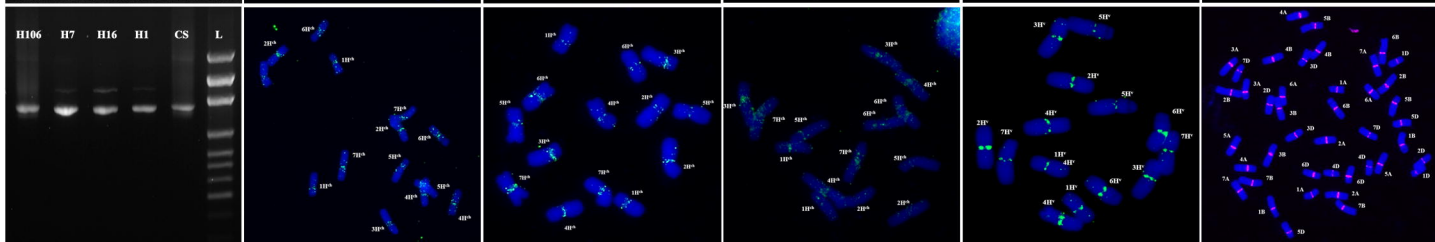

Source: http://biorxiv.org/content/10.1101/255786v1.full.pdf
